# Supplementary material for: Frequency and association of Epstein-Barr Virus genotype in rheumatoid arthritis patients of Khyber Pakhtunkhwa, Pakistan
Source: PubMed Central journal article supplement (PMC10732363; doi:10.1371/journal.pone.0295124), 2023-12-20

**A B C D E F G H**

50 bp

**I**

**J**

**K**

50 bp

**A-G, I, J: 75 bp**

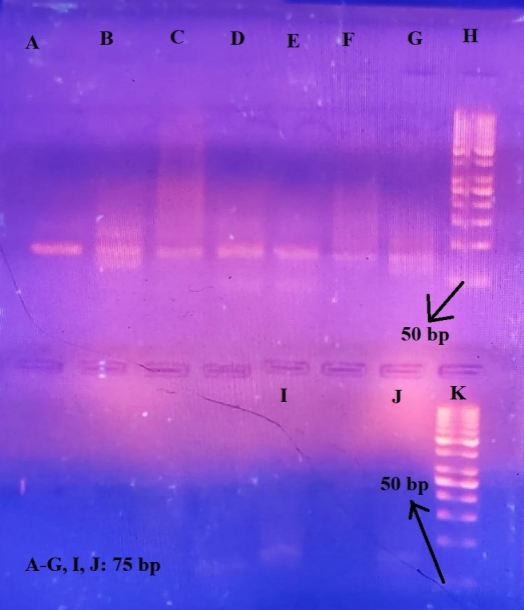

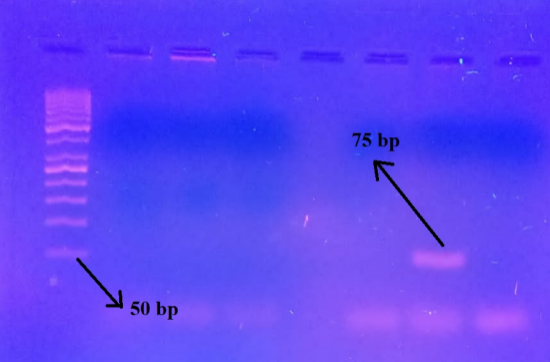

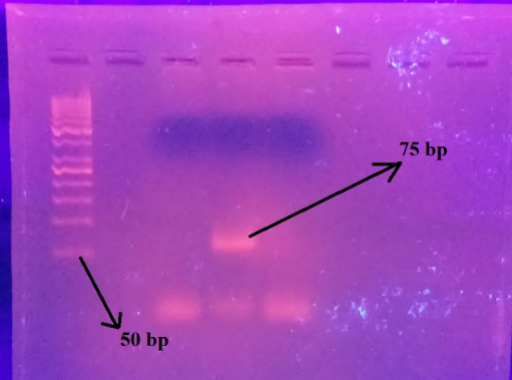

1 2 3 4 5 6

1-3, 6: 75 bp

50 bp

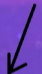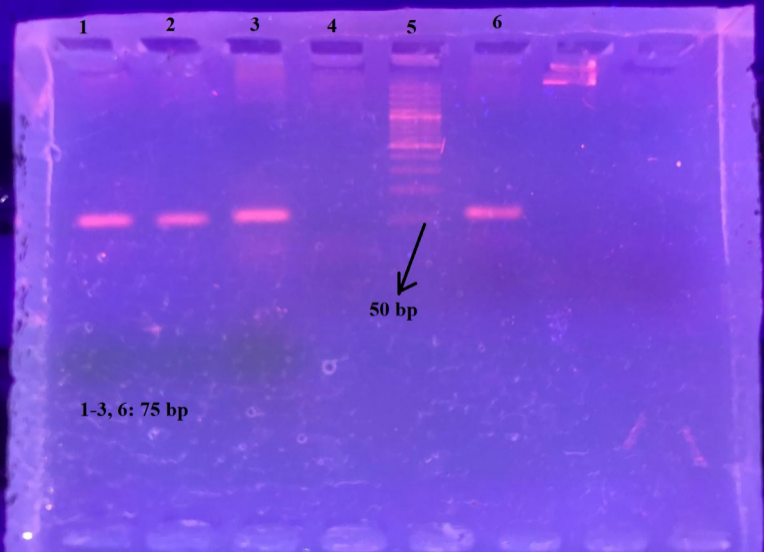

75 bp  
50 bp

50 bp  
75 bp

**i**      **k**      **l**      **m**

— — — —

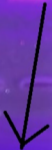

**50 bp**

**i-m: 75 bp**

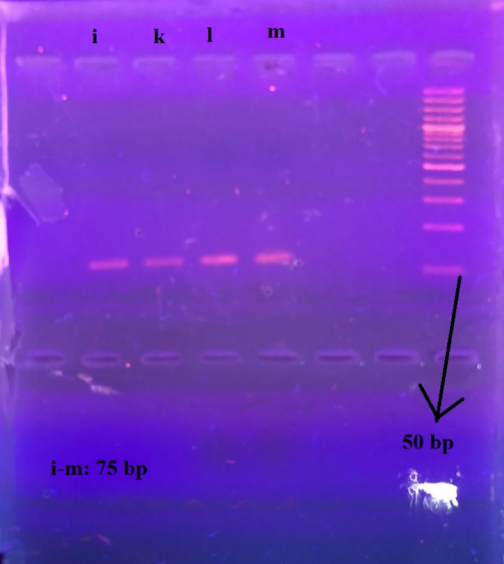

Supplement: pone.0295124.s002.pdf [file pone.0295124.s002.pdf]
